# Supplementary material for: Culturally safe interventions in primary care for the management of chronic diseases of urban Indigenous People: a scoping review
Source: HighWire-hosted journal article supplement (doi:10.1136/fmch-2022-001606), 2022-05-01
Supplement: fmch-2022-001606supp001_data_supplement.pdf [file fmch-2022-001606supp001_data_supplement.pdf]

## Supplementary File

Table 1 – Description of the Research Question

| Acronym | Definition           | Description                                                                                                                                                                                                                                                                                                                                                                                                                                                                                                                                    | Inclusions                                                                         | Exclusions                                                                                                                       |
|---------|----------------------|------------------------------------------------------------------------------------------------------------------------------------------------------------------------------------------------------------------------------------------------------------------------------------------------------------------------------------------------------------------------------------------------------------------------------------------------------------------------------------------------------------------------------------------------|------------------------------------------------------------------------------------|----------------------------------------------------------------------------------------------------------------------------------|
| P       | Type of participants | Indigenous people : People who face the following realities: <i>“eviction from their ancestral lands, being denied the opportunity to express their culture, physical attacks and treatment as second-class citizens.”</i> <sup>1</sup><br><br>Urban: <i>“Urban areas are very developed, meaning there is a density of human structures such as houses, commercial buildings, roads, bridges, and railways. Refers to towns, cities, and suburbs. An urban area includes the city itself, as well as the surrounding areas.”</i> <sup>2</sup> | Any Indigenous population living in an urban area                                  | Remote areas<br>Rural areas<br>On-reserve                                                                                        |
| C       | Concept              | Health interventions: <i>“ need to reach people either by being provided at their homes, schools, and workplaces or by encouraging them to visit health facilities.”</i> <sup>3</sup><br><br>Cultural safety <i>“results in an environment free of racism and discrimination, where people feel safe when receiving healthcare.”</i> <sup>4</sup>                                                                                                                                                                                              | Culturally safe interventions to prevent or manage chronic diseases                | Interventions that are not culturally safe or with no social acceptability<br><br>Medical conditions other than chronic diseases |
| C       | Context              | Primary care: <i>“Primary care is the element within primary healthcare that focuses on healthcare services, including health promotion, illness and injury prevention, and the diagnosis and treatment of illness and injury.”</i> <sup>5</sup>                                                                                                                                                                                                                                                                                               | Services delivered by front-line healthcare professionals in primary care settings | Other contexts than primary care (eg, school systems, justice systems)                                                           |

Table 2 – List of terms used in the search strategy

| Concept                         | Keywords                                                                                                                                                                                                                                                                                                                                                                                     | Databases and search engines                     |
|---------------------------------|----------------------------------------------------------------------------------------------------------------------------------------------------------------------------------------------------------------------------------------------------------------------------------------------------------------------------------------------------------------------------------------------|--------------------------------------------------|
| <b>Indigenous population</b>    | AB Native OR AB Aboriginal OR AB Indians OR AB Indigenous OR AB Ancestry group OR AB Indigenous elders OR AB Alaska natives OR AB American indian OR AB Underserved populations OR AB Torres strait islanders OR AB Cree OR AB Inuits OR AB Native-born OR AB Metis OR AB First nations OR AB Native tribes OR AB Alaskan natives                                                            | EBSCO, MEDLINE, PsycArticles, PsycInfo, SocINDEX |
| <b>Chronic disease</b>          | AB Diabetes OR AB High blood pressure OR AB Obesity OR AB Hypercholesterolemia OR AB Chronic pain OR AB Multimorbidity OR AB Chronic kidney disease OR AB Peripheral arterial disease OR AB Heart failure OR AB Long term condition OR AB Chronic illness OR AB Chronic condition                                                                                                            |                                                  |
| <b>Primary care</b>             | AB Primary healthcare OR AB Models of service delivery OR AB Well being model OR AB Health services accessibility OR AB Indigenous health services OR AB Ambulatory care facilities OR AB Aboriginal access to services OR AB Models of care OR AB Primary care OR AB Family practice OR AB Family medicine group OR AB Family medicine OR AB Family health clinic OR AB Primary health care |                                                  |
| <b>Cultural safety</b>          | TX Cultural quotient OR TX Appropriateness OR TX Acceptability OR TX Cultural safety OR TX Cultural adaptability OR TX Cultural intelligence OR TX Patient acceptance of care OR TX Cultural respect OR TX Cultural competency OR TX Cross-cultural safety OR TX Culturally competent care OR TX Cultural competence                                                                         |                                                  |
| <b>Internet Search strategy</b> |                                                                                                                                                                                                                                                                                                                                                                                              |                                                  |
| <b>1</b>                        | Native, Chronic diseases, Primary care, Cultural safety                                                                                                                                                                                                                                                                                                                                      | Google, first five pages of results              |
| <b>2</b>                        | Aboriginal, Chronic diseases, Primary care, Cultural safety                                                                                                                                                                                                                                                                                                                                  |                                                  |
| <b>3</b>                        | Indians, Chronic diseases, Primary care, Cultural safety                                                                                                                                                                                                                                                                                                                                     |                                                  |
| <b>4</b>                        | Indigenous, Chronic diseases, Primary care, Cultural safety                                                                                                                                                                                                                                                                                                                                  |                                                  |
| <b>5</b>                        | Torres strait islanders, Chronic diseases, Primary care, Cultural safety                                                                                                                                                                                                                                                                                                                     |                                                  |

Figure 1 Geographic distribution and diseases targeted by included studies

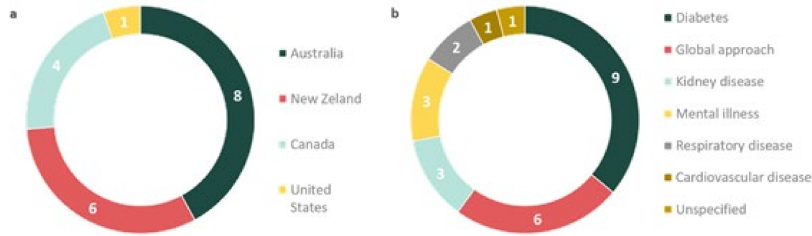

## References

1. International, A. *Indigenous Peoples*. 2019 Accessed on: 18 July 2021  
<https://www.amnesty.org/en/what-we-do/indigenous-peoples/>
2. Geographic, N. *Urban area*. Encyclopedic entry 2011 Accessed on: 9 July 2021  
<https://www.nationalgeographic.org/encyclopedia/urban-area/>
3. Jamison DT, B.J., Measham AR, et al., *Chapter 6, Providing Interventions*. , in *Priorities in Health* 2006, The International Bank for Reconstruction and Development / The World Bank: Washington DC.
4. Authority, F.N.H. *Cultural Safety and Humility*. 2021 Accessed on: 17 July 2021  
<https://www.fnha.ca/wellness/wellness-and-the-first-nations-health-authority/cultural-safety-and-humility>
5. Canada, G.o. *About primary health care*. 2012 Accessed on: 17 July 2021  
<https://www.canada.ca/en/health-canada/services/primary-health-care/about-primary-health-care.html>
